# Supplementary material
Source: Springer Nature journal article supplement (https://www.springermedizin.de/resource/supplementary/12885_2012_3652_MOESM2_ESM.pdf/9463764)

**Fig. S2****PADI2 gene-level expression compared to distribution of all genes**

*PADI2* expression in Luminal cell lines is significantly different ( $p = 3.59E-5$ ) from non-luminal cell lines (Basal, Basal\_NM, Claudin low)

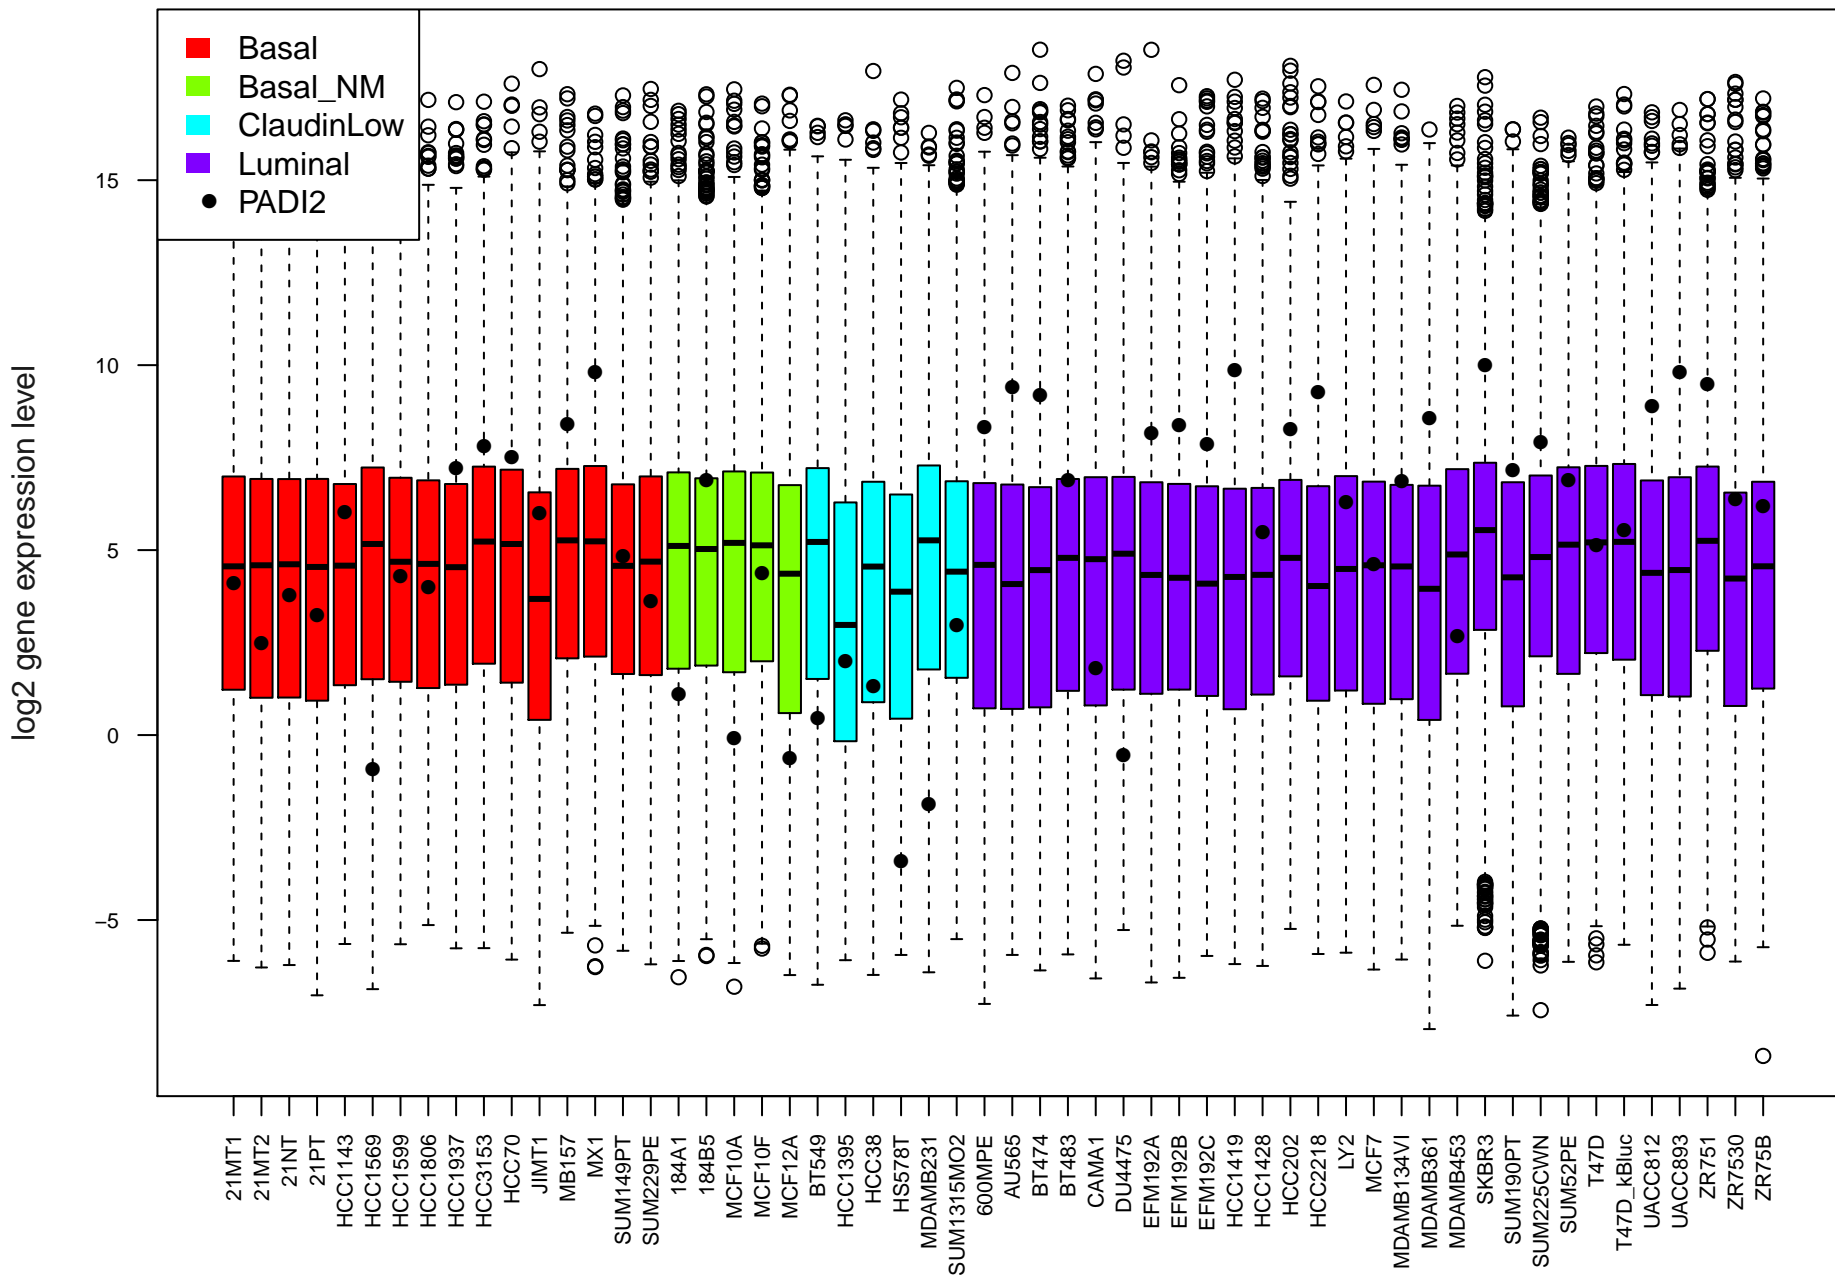

Supplement: MOESM2 [file 9463764]
